# Supplementary material for: Effects of onabotulinumtoxinA treatment in patients with and without allodynia: results of the COMPEL study
Source: Springer Nature journal article supplement (doi:10.1186/s10194-018-0952-1), 2019-01-22
Supplement: MOESM1 [file 16412634]

**Supplementary Figure 1.** Effect of onabotulinumtoxinA on **(A)** headache frequency and **(B)** moderate to severe headache frequency in patients with vs without allodynia at baseline.

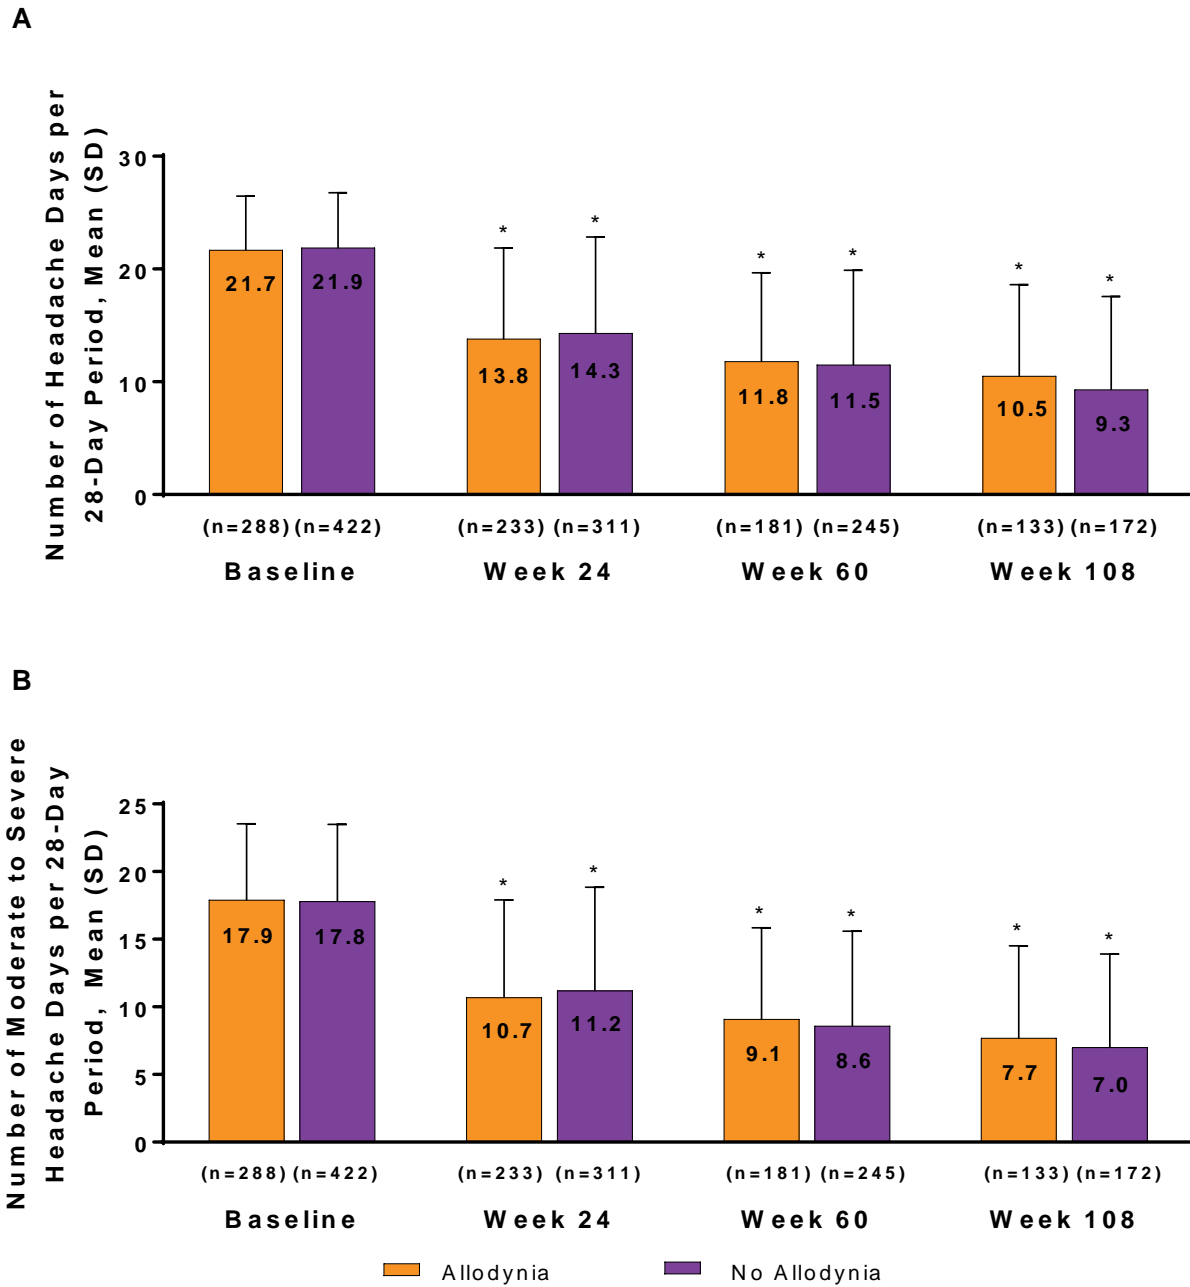

\* $P < 0.001$  for within-group comparison with baseline.
